# Supplementary material
Source: publisher figshare collection journal article supplement (https://frontiersin.figshare.com/ndownloader/files/30968242)
Supplement: Supplementary file [file 30968242]

## *Supplementary Material*

**Supplementary Video 1.** Fluo-4-AM- loaded trypomastigotes incubated with ECM. Correct loading was verified by fluorescence microscopy before every experiment. The video represents 50 frames of 0.5 s. White bar represents 100  $\mu\text{m}$ .
